# Supplementary material for: A Machine Learning Predictive Model of Bloodstream Infection in Hospitalized Patients
Source: MDPI journal article supplement (doi:10.3390/diagnostics14040445), 2024-02-17

Table S1: Cut-off numerical variables

| <b>Variables</b>                            | <b>Cut-off</b>  |
|---------------------------------------------|-----------------|
| Age (years)                                 | >80             |
| Blood urea nitrogen, mg/dl                  | >13             |
| Total Bilirubin, mg/dl,                     | >1.3; >2; >6    |
| Creatinine, mg/dl,                          | >3, >0.66       |
| C-reactive protein, mg/l                    | >184.6          |
| Procalcitonin, ng/ml                        | >1              |
| White blood cells [WBC], /mm <sup>3</sup>   | >10             |
| Neutrophils, /mm <sup>3</sup>               | >7              |
| Time to BSI (days)                          | >6; >12         |
| Index_CM                                    | >=2             |
| Platelet, x10 <sup>9</sup> /mm <sup>3</sup> | <150; <100; <50 |
| Cholesterol, mg/dl,                         | <130            |

Figure S1: Calibration plot on testing data

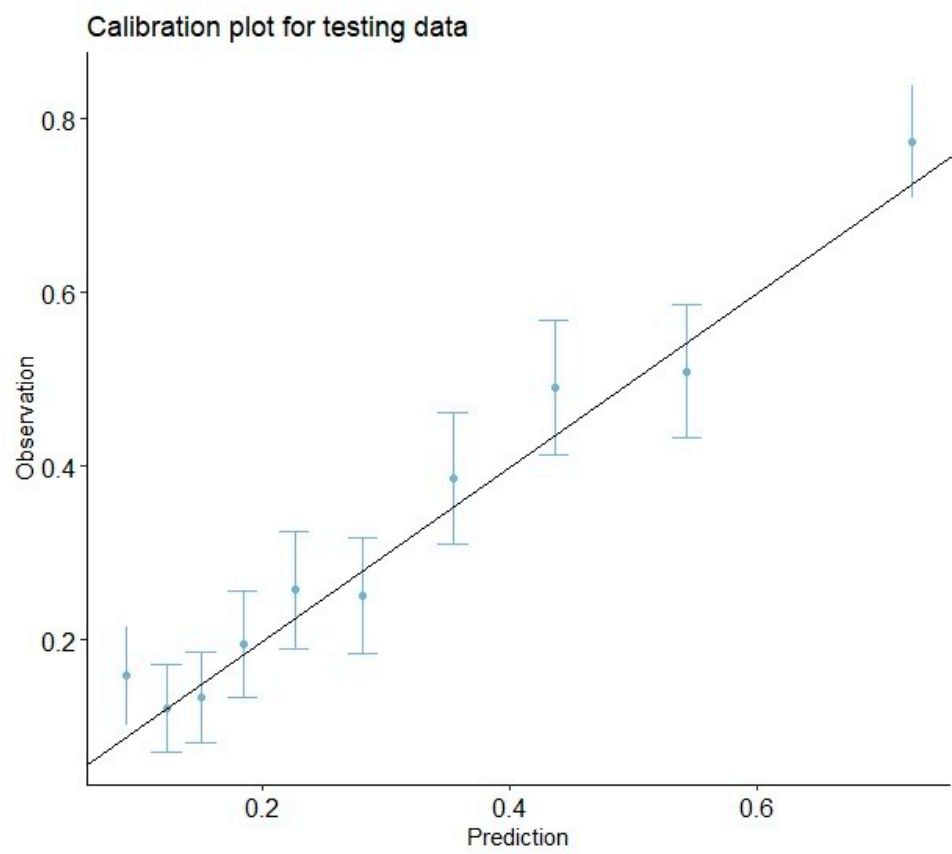

Figure S2: Lift and gain plot on testing data

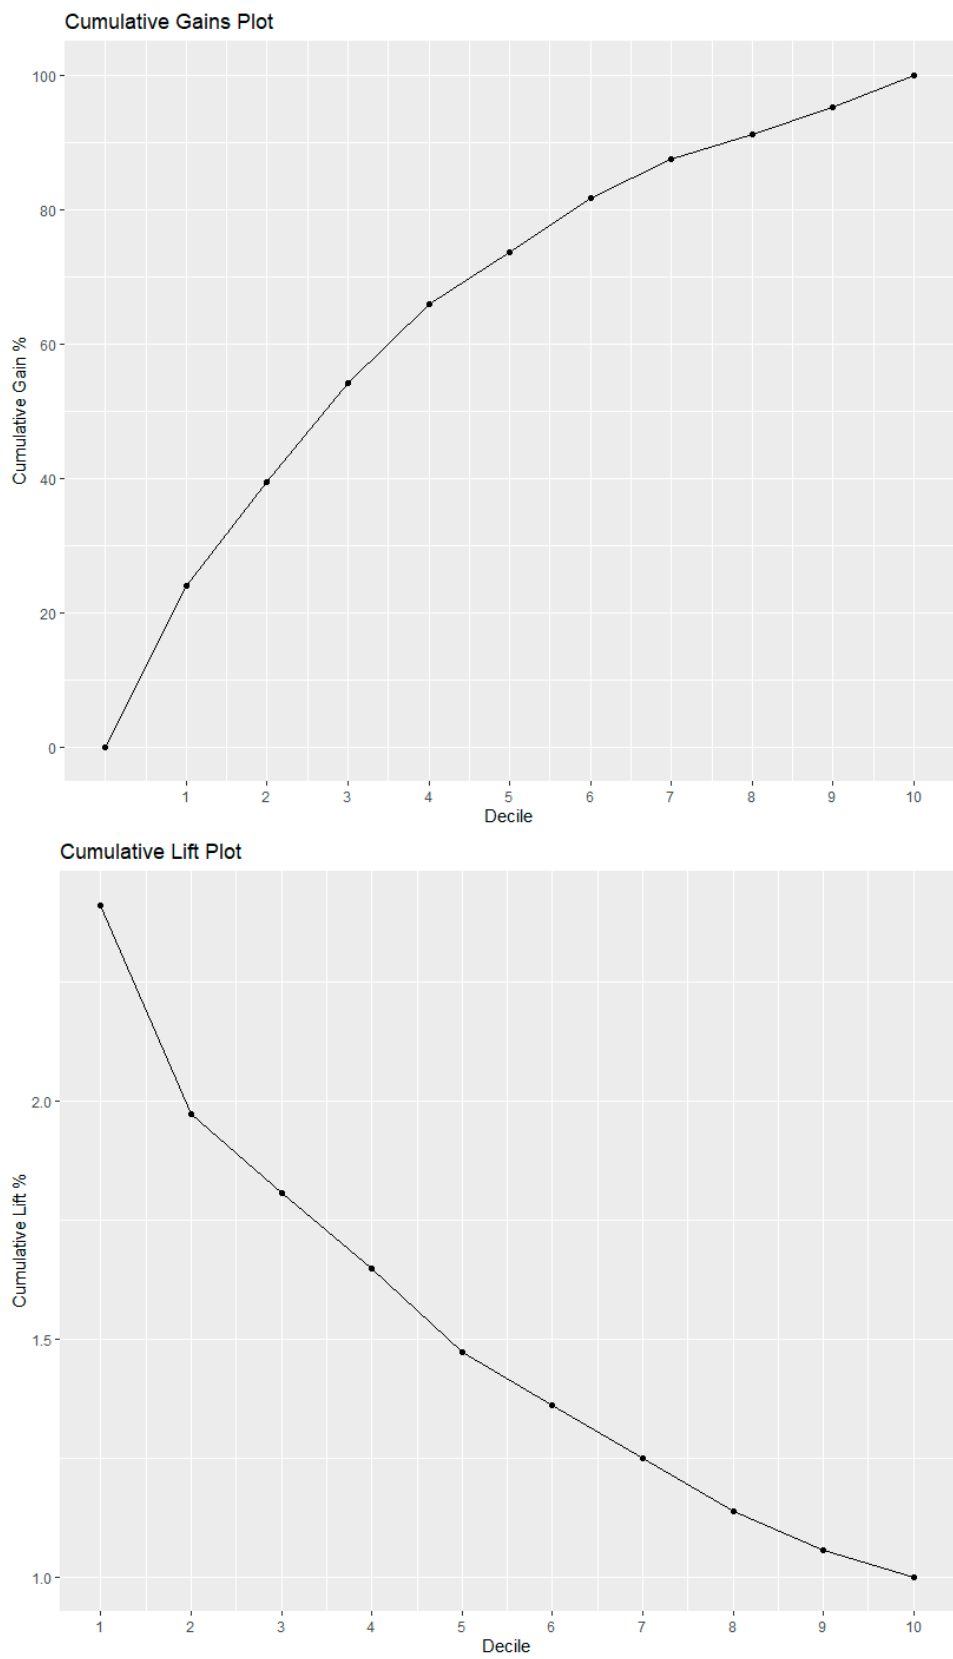

Supplement: s1 [file s1]
